# Supplementary material for: Imputation of Gene Expression Data in Blood Cancer and Its Significance in Inferring Biological Pathways
Source: PubMed Central journal article supplement (PMC6960109; doi:10.3389/fonc.2019.01442), 2020-01-08
Supplement: Data_Sheet_1.pdf [file Data_Sheet_1.pdf]

# Supplementary Material to “Imputation of gene expression data in blood cancer and its significance in inferring biological pathways”

## 1 SUPPLEMENTARY TABLES AND FIGURES

This Section contains additional results in the form of tables and bubble plots on the four dataset- CLL, AML, MM-Spanish and MM-India. It contains results obtained from KEGG pathway analysis and GO analysis. These tables and figures are appropriately referred in the main manuscript.

Table-T1: Classification accuracy and  $F_1$  scores on different sampling percentage of incomplete matrix and the recovered/imputed matrix on MM-Spanish data.

SR stands for Sampling ratio of observed data to the total data (in percentage).

| SR | Classification Accuracy |             |                       |             | F <sub>1</sub> score |             |                       |             |
|----|-------------------------|-------------|-----------------------|-------------|----------------------|-------------|-----------------------|-------------|
|    | KNN                     |             | Linear SVM classifier |             | KNN                  |             | Linear SVM classifier |             |
|    | Observed                | Imputed     | Observed              | Imputed     | Observed             | Imputed     | Observed              | Imputed     |
| 10 | 0.22                    | <b>0.60</b> | 0.77                  | <b>0.80</b> | 0.21                 | <b>0.59</b> | 0.75                  | <b>0.80</b> |
| 20 | 0.35                    | <b>0.82</b> | 0.70                  | <b>0.88</b> | 0.37                 | <b>0.82</b> | 0.68                  | <b>0.88</b> |
| 30 | 0.60                    | <b>0.88</b> | 0.72                  | <b>0.90</b> | 0.60                 | <b>0.88</b> | 0.71                  | <b>0.90</b> |
| 40 | 0.56                    | <b>0.86</b> | 0.65                  | <b>0.92</b> | 0.54                 | <b>0.84</b> | 0.64                  | <b>0.92</b> |
| 50 | 0.54                    | <b>0.84</b> | 0.72                  | <b>0.94</b> | 0.65                 | <b>0.84</b> | 0.70                  | <b>0.94</b> |
| 60 | 0.66                    | <b>0.83</b> | 0.76                  | <b>0.93</b> | 0.63                 | <b>0.84</b> | 0.74                  | <b>0.93</b> |
| 70 | 0.63                    | <b>0.89</b> | 0.75                  | <b>0.92</b> | 0.62                 | <b>0.89</b> | 0.74                  | <b>0.92</b> |
| 80 | 0.67                    | <b>0.86</b> | 0.83                  | <b>0.92</b> | 0.86                 | <b>0.86</b> | 0.81                  | <b>0.92</b> |
| 90 | 0.67                    | <b>0.87</b> | 0.86                  | <b>0.94</b> | 0.88                 | <b>0.87</b> | 0.85                  | <b>0.94</b> |

Table-T2: Adjusted  $p$ -values for KEGG pathways at ground truth, 50% observed and imputed data, 70% observed and imputed data for CLL dataset.

| Term                                                     | Ground Truth | 50%      |           | 70%      |           |
|----------------------------------------------------------|--------------|----------|-----------|----------|-----------|
|                                                          |              | Observed | Recovered | Observed | Recovered |
| Pathways in cancer                                       | 2.75E-13     | 6.17E-07 | 1.08E-08  | 1.21E-11 | 5.59E-13  |
| Transcriptional misregulation in cancer                  | 3.30E-15     | 3.25E-15 | 1.82E-12  | 3.26E-15 | 6.98E-12  |
| MAPK signaling pathway                                   | 3.13E-08     | 5.71E-06 | 1.50E-05  | 5.13E-12 | 5.25E-10  |
| Acute myeloid leukemia                                   | 3.04E-08     | 3.31E-03 | 1.57E-04  | 3.01E-08 | 2.79E-07  |
| T cell receptor signaling pathway                        | 2.55E-08     | 2.28E-01 | 2.25E-01  | 2.40E-04 | 1.48E-05  |
| Chronic myeloid leukemia                                 | 5.54E-08     | 9.35E-03 | 3.88E-05  | 3.44E-07 | 7.84E-09  |
| HTLV-I infection                                         | 1.42E-07     | 5.35E-05 | 5.22E-07  | 5.13E-12 | 6.34E-07  |
| Proteoglycans in cancer                                  | 5.69E-07     | 1.51E-03 | 1.85E-03  | 2.21E-05 | 8.40E-06  |
| ErbB signaling pathway                                   | 2.56E-06     | 1.51E-01 | 2.73E-03  | 5.51E-05 | 5.09E-05  |
| B cell receptor signaling pathway                        | 1.66E-05     | 2.14E-01 | 2.11E-01  | 1.49E-03 | 1.40E-03  |
| AGE-RAGE signaling pathway                               | 5.93E-05     | 4.02E-02 | 1.70E-02  | 1.91E-04 | 4.35E-05  |
| Neurotrophin signaling pathway                           | 6.74E-05     | 4.82E-03 | 3.88E-05  | 1.27E-07 | 3.38E-06  |
| Wnt signaling pathway                                    | 8.33E-05     | 3.10E-02 | 2.13E-03  | 6.66E-05 | 1.90E-05  |
| Signaling pathways regulating pluripotency of stem cells | 8.33E-05     | 6.01E-04 | 3.74E-06  | 5.33E-06 | 6.18E-05  |
| Chemokine signaling pathway                              | 1.13E-04     | 2.02E-01 | 2.47E-02  | 3.82E-02 | 8.19E-02  |
| TNF signaling pathway                                    | 1.13E-04     | 2.81E-04 | 2.25E-02  | 1.94E-07 | 1.27E-06  |
| TGF-beta signaling pathway                               | 2.37E-04     | 1.27E-04 | 4.75E-04  | 4.27E-05 | 1.81E-04  |
| Toll-like receptor signaling pathway                     | 3.17E-04     | 6.52E-03 | 1.14E-01  | 1.57E-05 | 3.99E-06  |
| PI3K-Akt signaling pathway                               | 1.43E-03     | 2.71E-03 | 2.14E-02  | 3.31E-05 | 1.99E-04  |
| p53 signaling pathway                                    | 2.67E-04     | 2.23E-03 | 2.47E-02  | 2.22E-04 | 9.81E-04  |
| HIF-1 signaling pathway                                  | 1.02E-03     | 6.00E-03 | 1.82E-02  | 1.24E-05 | 1.99E-04  |
| NF-kappa B signaling pathway                             | 4.65E-04     | 1.48E-05 | 3.53E-03  | 9.93E-05 | 2.19E-05  |
| Ras signaling pathway                                    | 1.96E-03     | 3.82E-02 | 3.99E-03  | 7.12E-04 | 4.73E-03  |
| Jak-STAT signaling pathway                               | 1.97E-03     | 2.03E-01 | 2.02E-01  | 1.49E-02 | 5.35E-03  |
| Hippo signaling pathway                                  | 4.57E-03     | 1.10E-03 | 3.99E-04  | 1.49E-03 | 4.28E-04  |
| FoxO signaling pathway                                   | 5.12E-03     | 5.27E-02 | 2.25E-02  | 1.56E-03 | 3.59E-05  |
| Phospholipase D signaling pathway                        | 8.76E-03     | 6.70E-01 | 1.50E-01  | 1.16E-01 | 5.33E-02  |
| RNA degradation                                          | 2.04E-03     | 3.99E-03 | 1.45E-02  | 1.96E-03 | 8.58E-07  |
| cGMP-PKG signaling pathway                               | 2.17E-02     | 7.95E-01 | 7.87E-01  | 4.66E-02 | 4.79E-02  |
| Insulin signaling pathway                                | 1.96E-02     | 6.49E-01 | 6.39E-02  | 1.02E-01 | 1.81E-02  |
| cAMP signaling pathway                                   | 5.82E-02     | 5.60E-01 | 2.36E-01  | 1.05E-02 | 5.33E-02  |
| NOD-like receptor signaling pathway                      | 1.74E-03     | 3.31E-03 | 1.21E-01  | 1.56E-03 | 1.18E-05  |
| Fc epsilon RI signaling pathway                          | 1.72E-02     | 3.98E-01 | 1.83E-01  | 5.07E-02 | 1.60E-02  |
| RIG-I-like receptor signaling pathway                    | 6.08E-02     | 2.02E-01 | 7.16E-01  | 1.79E-02 | 4.73E-03  |
| Notch signaling pathway                                  | 2.00E-01     | 2.95E-04 | 6.94E-03  | 5.76E-02 | 1.56E-02  |

Table-T3: Adjusted  $p$ -values for KEGG pathways at ground truth, 50% observed and imputed data, 70% observed and imputed data for AML dataset.

| Term                                                     | Ground Truth | 50%      |           | 70%      |           |
|----------------------------------------------------------|--------------|----------|-----------|----------|-----------|
|                                                          |              | Observed | Recovered | Observed | Recovered |
| Signaling pathways regulating pluripotency of stem cells | 2.76E-12     | 2.06E-19 | 1.63E-17  | 1.57E-15 | 1.02E-12  |
| Pathways in cancer                                       | 2.71E-09     | 6.56E-10 | 8.63E-06  | 2.81E-11 | 2.81E-11  |
| HTLV-I infection                                         | 1.58E-05     | 5.59E-07 | 2.86E-04  | 2.34E-06 | 2.34E-06  |
| Hippo signaling pathway                                  | 9.62E-06     | 2.21E-06 | 3.11E-05  | 2.99E-07 | 7.10E-06  |
| Transcriptional misregulation in cancer                  | 1.58E-05     | 5.42E-04 | 1.37E-07  | 2.71E-08 | 2.71E-08  |
| TGF-beta signaling pathway                               | 2.47E-05     | 9.89E-07 | 1.15E-06  | 2.30E-09 | 1.15E-06  |
| FoxO signaling pathway                                   | 1.21E-04     | 6.34E-06 | 4.98E-02  | 6.27E-06 | 1.23E-06  |
| Proteoglycans in cancer                                  | 6.57E-04     | 7.41E-05 | 1.89E-04  | 2.00E-07 | 2.00E-07  |
| Hedgehog signaling pathway                               | 4.57E-04     | 7.41E-05 | 1.48E-03  | 2.31E-04 | 8.04E-03  |
| Cytokine-cytokine receptor interaction                   | 1.33E-03     | 1.27E-02 | 7.11E-03  | 1.09E-03 | 3.57E-06  |
| p53 signaling pathway                                    | 6.57E-04     | 5.56E-04 | 1.66E-03  | 1.66E-03 | 5.31E-05  |
| PI3K-Akt signaling pathway                               | 2.97E-03     | 2.53E-04 | 1.02E-03  | 1.02E-03 | 5.26E-07  |
| Wnt signaling pathway                                    | 2.02E-03     | 5.88E-04 | 8.98E-04  | 2.65E-02 | 2.40E-04  |
| T cell receptor signaling pathway                        | 2.24E-03     | 2.36E-03 | 4.64E-02  | 4.58E-03 | 1.19E-03  |
| Jak-STAT signaling pathway                               | 4.38E-03     | 1.61E-04 | 6.49E-03  | 6.36E-04 | 6.36E-04  |
| HIF-1 signaling pathway                                  | 6.72E-03     | 1.61E-04 | 5.36E-05  | 4.32E-03 | 1.02E-05  |
| ErbB signaling pathway                                   | 8.50E-03     | 2.30E-02 | 6.12E-03  | 6.12E-03 | 1.50E-03  |
| Neurotrophin signaling pathway                           | 1.67E-02     | 8.99E-02 | 8.08E-02  | 1.06E-02 | 1.06E-02  |
| MAPK signaling pathway                                   | 2.47E-02     | 3.26E-04 | 1.23E-02  | 2.49E-04 | 8.05E-05  |
| Ras signaling pathway                                    | 4.98E-02     | 1.89E-02 | 2.09E-01  | 6.22E-04 | 4.70E-06  |
| Toll-like receptor signaling pathway                     | 6.60E-02     | 1.33E-01 | 2.74E-01  | 1.27E-01 | 1.71E-02  |
| AGE-RAGE signaling pathway                               | 1.20E-01     | 5.35E-03 | 7.22E-01  | 3.83E-03 | 4.47E-05  |
| cGMP-PKG signaling pathway                               | 1.60E-01     | 4.41E-01 | 7.91E-01  | 2.40E-01 | 2.48E-02  |
| TNF signaling pathway                                    | 1.60E-01     | 1.48E-01 | 7.65E-01  | 2.05E-02 | 6.40E-03  |
| Rap1 signaling pathway                                   | 2.00E-01     | 1.99E-01 | 4.33E-01  | 7.02E-03 | 2.42E-05  |
| NOD-like receptor signaling pathway                      | 5.43E-02     | 1.40E-01 | 4.19E-01  | 5.40E-02 | 2.92E-03  |
| AMPK signaling pathway                                   | 2.12E-01     | 5.91E-03 | 3.98E-03  | 1.27E-02 | 2.85E-04  |
| Fc epsilon RI signaling pathway                          | 2.12E-01     | 2.54E-02 | 5.10E-01  | 9.04E-02 | 2.75E-02  |

Table-T4: Adjusted  $p$ -values for KEGG pathways at ground truth, 50% observed and imputed data, 70% observed and imputed data for MM-Spanish dataset.

| Term                                                     | Ground Truth | 50%      |           | 70%      |           |
|----------------------------------------------------------|--------------|----------|-----------|----------|-----------|
|                                                          |              | Observed | Recovered | Observed | Recovered |
| Epstein-Barr virus infection                             | 6.07E-08     | 8.04E-03 | 2.16E-03  | 3.61E-04 | 8.59E-07  |
| T cell receptor signaling pathway                        | 2.31E-05     | 6.10E-02 | 2.76E-02  | 2.34E-03 | 1.41E-03  |
| Pathways in cancer                                       | 1.18E-04     | 1.92E-04 | 5.94E-09  | 3.37E-03 | 2.07E-05  |
| RNA polymerase                                           | 4.92E-05     | 3.32E-01 | 3.43E-01  | 3.47E-01 | 3.84E-02  |
| RNA degradation                                          | 1.18E-04     | 5.45E-02 | 4.26E-04  | 4.60E-02 | 7.65E-03  |
| MAPK signaling pathway                                   | 4.50E-04     | 1.40E-01 | 2.81E-02  | 2.58E-02 | 4.67E-02  |
| NF-kappa B signaling pathway                             | 4.10E-04     | 5.83E-01 | 9.61E-02  | 3.57E-02 | 4.04E-02  |
| FoxO signaling pathway                                   | 1.59E-03     | 6.95E-02 | 1.82E-03  | 1.54E-03 | 2.56E-03  |
| Apoptosis                                                | 2.22E-03     | 7.94E-01 | 3.99E-02  | 7.59E-02 | 1.67E-02  |
| Neurotrophin signaling pathway                           | 2.22E-03     | 9.39E-02 | 2.25E-03  | 4.08E-02 | 4.51E-02  |
| HTLV-I infection                                         | 2.62E-03     | 9.13E-03 | 2.36E-01  | 8.16E-03 | 1.18E-03  |
| Ras signaling pathway                                    | 5.26E-03     | 1.46E-01 | 2.81E-02  | 2.37E-01 | 4.67E-02  |
| Rap1 signaling pathway                                   | 6.37E-03     | 3.65E-02 | 3.36E-02  | 1.83E-01 | 5.83E-02  |
| Thyroid hormone signaling pathway                        | 6.22E-03     | 2.80E-03 | 2.16E-03  | 5.64E-04 | 1.25E-03  |
| PI3K-Akt signaling pathway                               | 6.62E-03     | 1.91E-02 | 4.02E-03  | 3.37E-03 | 1.58E-02  |
| AGE-RAGE signaling pathway in diabetic complications     | 6.59E-03     | 2.65E-02 | 2.38E-02  | 1.07E-01 | 9.55E-03  |
| VEGF signaling pathway                                   | 6.25E-03     | 1.58E-01 | 6.69E-02  | 1.55E-01 | 1.53E-01  |
| RNA transport                                            | 7.73E-03     | 2.74E-01 | 1.66E-01  | 8.34E-02 | 1.07E-02  |
| HIF-1 signaling pathway                                  | 6.89E-03     | 1.20E-01 | 9.45E-03  | 2.50E-02 | 2.31E-01  |
| Transcriptional misregulation in cancer                  | 1.03E-02     | 8.04E-03 | 2.91E-04  | 5.41E-02 | 1.33E-03  |
| Fc epsilon RI signaling pathway                          | 8.37E-03     | 6.67E-01 | 9.37E-02  | 1.94E-01 | 1.94E-01  |
| Signaling pathways regulating pluripotency of stem cells | 1.43E-02     | 5.00E-03 | 8.24E-03  | 3.57E-03 | 9.28E-03  |
| Prolactin signaling pathway                              | 1.09E-02     | 4.33E-01 | 4.07E-02  | 3.68E-02 | 4.16E-02  |
| ErbB signaling pathway                                   | 2.54E-02     | 1.58E-01 | 3.08E-02  | 3.96E-03 | 1.12E-02  |
| cAMP signaling pathway                                   | 4.16E-02     | 5.00E-03 | 3.50E-05  | 2.50E-02 | 4.67E-02  |
| B cell receptor signaling pathway                        | 3.66E-02     | 2.26E-01 | 4.23E-02  | 9.69E-02 | 1.04E-01  |

Table-T5: Adjusted  $p$ -values for KEGG pathways at ground truth and 70% observed and imputed data for MM-Indian dataset.

| Term                                                     | Adjusted P-value | 70%      |           |
|----------------------------------------------------------|------------------|----------|-----------|
|                                                          |                  | Observed | Recovered |
| Signaling pathways regulating pluripotency of stem cells | 3.23E-03         | 3.31E-04 | 2.26E-05  |
| Pathways in cancer                                       | 4.65E-03         | 3.43E-04 | 1.00E-04  |
| PI3K-Akt signaling pathway                               | 3.30E-03         | 5.46E-03 | 7.06E-04  |
| Proteoglycans in cancer                                  | 3.72E-03         | 5.68E-04 | 7.84E-05  |
| Ras signaling pathway                                    | 4.93E-03         | 2.42E-02 | 1.54E-02  |
| Breast cancer                                            | 4.33E-03         | 4.45E-04 | 1.53E-03  |
| Gastric cancer                                           | 4.26E-03         | 6.27E-05 | 8.14E-05  |
| T cell receptor signaling pathway                        | 8.44E-03         | 8.61E-02 | 3.07E-03  |
| Non-small cell lung cancer                               | 7.95E-03         | 5.50E-03 | 1.12E-02  |
| Transcriptional misregulation in cancer                  | 7.82E-03         | 5.55E-01 | 1.37E-03  |
| ErbB signaling pathway                                   | 7.59E-03         | 5.57E-03 | 3.48E-03  |
| Regulation of actin cytoskeleton                         | 8.59E-03         | 1.05E-01 | 1.36E-01  |
| Spliceosome                                              | 1.31E-02         | 3.52E-04 | 1.51E-02  |
| Pancreatic cancer                                        | 1.23E-02         | 2.89E-03 | 1.76E-02  |
| Herpes simplex virus 1 infection                         | 1.41E-02         | 5.43E-03 | 5.48E-04  |
| Human papillomavirus infection                           | 1.33E-02         | 1.02E-02 | 1.53E-03  |
| HIF-1 signaling pathway                                  | 1.63E-02         | 3.36E-02 | 2.96E-05  |
| Hepatocellular carcinoma                                 | 1.86E-02         | 3.17E-04 | 5.62E-04  |
| Acute myeloid leukemia                                   | 2.07E-02         | 1.64E-02 | 7.61E-04  |
| Colorectal cancer                                        | 2.14E-02         | 2.17E-03 | 3.30E-04  |
| Renal cell carcinoma                                     | 2.43E-02         | 1.96E-02 | 3.48E-04  |
| TGF-beta signaling pathway                               | 2.49E-02         | 5.52E-02 | 9.17E-02  |
| Rap1 signaling pathway                                   | 2.71E-02         | 4.73E-01 | 5.95E-02  |
| Melanoma                                                 | 2.62E-02         | 3.84E-01 | 1.52E-02  |
| Primary immunodeficiency                                 | 2.55E-02         | 6.56E-01 | 5.53E-02  |
| Cellular senescence                                      | 2.67E-02         | 3.84E-01 | 7.30E-03  |
| Thyroid hormone signaling pathway                        | 2.80E-02         | 1.36E-01 | 4.13E-02  |
| Chronic myeloid leukemia                                 | 3.07E-02         | 9.44E-03 | 1.82E-02  |
| Prostate cancer                                          | 3.06E-02         | 4.02E-03 | 7.19E-03  |
| Sphingolipid signaling pathway                           | 3.01E-02         | 6.91E-02 | 3.43E-04  |
| Cell cycle                                               | 3.83E-02         | 1.67E-01 | 1.21E-01  |

|              | 100%                                                                 | 50%      |          | 70%      |          |
|--------------|----------------------------------------------------------------------|----------|----------|----------|----------|
|              | Ground Truth                                                         | Observed | Imputed  | Observed | Imputed  |
| <b>1</b>     | <b>Transcriptional misregulation in cancer_Homo sapiens_hsa05202</b> |          |          |          |          |
| Overlap      | 31/180                                                               | 31/180   | 28/180   | 31/180   | 27/180   |
| Adj. p-value | 3.30E-15                                                             | 3.25E-15 | 1.82E-12 | 3.26E-15 | 6.98E-12 |
| Comb. score  | 67.49                                                                | 67.49    | 56.44    | 67.49    | 52.19    |
| <b>2</b>     | <b>Pathways in cancer_Homo sapiens_hsa05200</b>                      |          |          |          |          |
| Overlap      | 42/397                                                               | 32/397   | 35/397   | 39/397   | 42/397   |
| Adj. p-value | 2.75E-13                                                             | 6.17E-07 | 1.08E-08 | 1.21E-11 | 5.59E-13 |
| Comb. score  | 69.69                                                                | 39.19    | 47.65    | 57.57    | 70.58    |
| <b>3</b>     | <b>Hepatitis B_Homo sapiens_hsa05161</b>                             |          |          |          |          |
| Overlap      | 24/146                                                               | 14/146   | 15/146   | 24/146   | 24/146   |
| Adj. p-value | 1.45E-11                                                             | 2.80E-04 | 6.18E-05 | 1.08E-11 | 1.47E-11 |
| Comb. score  | 54.83                                                                | 18.06    | 20.59    | 54.09    | 54.83    |
| <b>4</b>     | <b>Measles_Homo sapiens_hsa05162</b>                                 |          |          |          |          |
| Overlap      | 23/136                                                               | 10/136   | 8/136    | 15/136   | 16/136   |
| Adj. p-value | 1.86E-11                                                             | 9.35E-03 | 5.86E-02 | 1.20E-05 | 3.38E-06 |
| Comb. score  | 50.89                                                                | 4.87     | 0.75     | 16.69    | 22.20    |
| <b>5</b>     | <b>Herpes simplex infection_Homo sapiens_hsa05168</b>                |          |          |          |          |
| Overlap      | 23/185                                                               | 14/185   | 13/185   | 23/185   | 23/185   |
| Adj. p-value | 9.76E-09                                                             | 1.83E-03 | 4.88E-03 | 1.27E-07 | 7.84E-09 |
| Comb. score  | 37.11                                                                | 10.24    | 7.75     | 28.19    | 36.58    |
| <b>6</b>     | <b>T cell receptor signaling pathway_Homo sapiens_hsa04660</b>       |          |          |          |          |
| Overlap      | 17/104                                                               | 5/104    | 5/104    | 11/104   | 13/104   |
| Adj. p-value | 2.55E-08                                                             | 2.28E-01 | 2.25E-01 | 2.40E-04 | 1.48E-05 |
| Comb. score  | 36.46                                                                | -1.59    | -1.76    | 6.47     | 15.99    |
| <b>7</b>     | <b>Acute myeloid leukemia_Homo sapiens_hsa05221</b>                  |          |          |          |          |
| Overlap      | 13/57                                                                | 7/57     | 9/57     | 13/57    | 12/57    |
| Adj. p-value | 3.04E-08                                                             | 3.31E-03 | 1.57E-04 | 3.01E-08 | 2.79E-07 |
| Comb. score  | 36.94                                                                | 7.01     | 17.66    | 36.94    | 31.04    |
| <b>8</b>     | <b>MAPK signaling pathway_Homo sapiens_hsa04010</b>                  |          |          |          |          |
| Overlap      | 26/255                                                               | 23/255   | 22/255   | 32/255   | 29/255   |
| Adj. p-value | 3.13E-08                                                             | 5.71E-06 | 1.50E-05 | 5.13E-12 | 5.25E-10 |
| Comb. score  | 37.06                                                                | 30.54    | 27.12    | 60.04    | 48.47    |
| <b>9</b>     | <b>Epstein-Barr virus infection_Homo sapiens_hsa05169</b>            |          |          |          |          |
| Overlap      | 23/202                                                               | 18/202   | 18/202   | 21/202   | 25/202   |
| Adj. p-value | 3.13E-08                                                             | 7.06E-05 | 5.82E-05 | 4.25E-07 | 1.81E-09 |
| Comb. score  | 35.55                                                                | 22.01    | 21.38    | 26.48    | 43.94    |
| <b>10</b>    | <b>Chronic myeloid leukemia_Homo sapiens_hsa05220</b>                |          |          |          |          |
| Overlap      | 14/73                                                                | 7/73     | 11/73    | 13/73    | 15/73    |
| Adj. p-value | 5.54E-08                                                             | 9.35E-03 | 3.88E-05 | 3.44E-07 | 7.84E-09 |
| Comb. score  | 32.25                                                                | 3.22     | 22.10    | 25.72    | 38.24    |
| <b>11</b>    | <b>HTLV-I infection_Homo sapiens_hsa05166</b>                        |          |          |          |          |
| Overlap      | 25/258                                                               | 21/258   | 25/258   | 32/258   | 24/258   |
| Adj. p-value | 1.42E-07                                                             | 5.35E-05 | 5.22E-07 | 5.13E-12 | 6.34E-07 |
| Comb. score  | 31.48                                                                | 22.93    | 35.20    | 57.00    | 28.98    |
| <b>12</b>    | <b>Viral carcinogenesis_Homo sapiens_hsa05203</b>                    |          |          |          |          |
| Overlap      | 22/205                                                               | 14/205   | 11/205   | 24/205   | 18/205   |
| Adj. p-value | 1.61E-07                                                             | 3.99E-03 | 4.05E-02 | 1.15E-08 | 2.61E-05 |
| Comb. score  | 31.30                                                                | 8.90     | 1.39     | 40.27    | 15.07    |
| <b>13</b>    | <b>Thyroid cancer_Homo sapiens_hsa05216</b>                          |          |          |          |          |
| Overlap      | 9/29                                                                 | 6/29     | 9/29     | 6/29     | 9/29     |
| Adj. p-value | 3.26E-07                                                             | 6.64E-04 | 1.06E-06 | 2.59E-04 | 4.31E-07 |
| Comb. score  | 19.55                                                                | 7.12     | 29.27    | -10.53   | 22.79    |
| <b>14</b>    | <b>Proteoglycans in cancer_Homo sapiens_hsa05205</b>                 |          |          |          |          |
| Overlap      | 21/203                                                               | 15/203   | 15/203   | 18/203   | 19/203   |
| Adj. p-value | 5.69E-07                                                             | 1.51E-03 | 1.85E-03 | 2.21E-05 | 8.40E-06 |
| Comb. score  | 28.45                                                                | 12.38    | 13.27    | 15.46    | 21.20    |
| <b>15</b>    | <b>Inflammatory bowel disease (IBD)_Homo sapiens_hsa05321</b>        |          |          |          |          |
| Overlap      | 12/65                                                                | 11/65    | 11/65    | 13/65    | 14/65    |
| Adj. p-value | 7.84E-07                                                             | 1.48E-05 | 1.50E-05 | 1.27E-07 | 1.39E-08 |
| Comb. score  | 23.71                                                                | 25.06    | 25.06    | 32.13    | 36.19    |
| <b>16</b>    | <b>Pancreatic cancer_Homo sapiens_hsa05212</b>                       |          |          |          |          |
| Overlap      | 12/66                                                                | 7/66     | 9/66     | 13/66    | 12/66    |
| Adj. p-value | 8.78E-07                                                             | 6.48E-03 | 4.31E-04 | 1.27E-07 | 1.10E-06 |
| Comb. score  | 23.89                                                                | 5.03     | 14.86    | 31.33    | 25.70    |

|              | 100%                                                                              | 50%      |          | 70%      |          |
|--------------|-----------------------------------------------------------------------------------|----------|----------|----------|----------|
|              | Ground Truth                                                                      | Observed | Imputed  | Observed | Imputed  |
| <b>17</b>    | <b>ErbB signaling pathway_Homo sapiens_hsa04012</b>                               |          |          |          |          |
| Overlap      | 13/87                                                                             | 5/87     | 9/87     | 11/87    | 11/87    |
| Adj. p-value | 2.56E-06                                                                          | 1.51E-01 | 2.73E-03 | 5.51E-05 | 5.09E-05 |
| Comb. score  | 21.71                                                                             | -1.29    | 10.26    | 9.84     | 8.48     |
| <b>18</b>    | <b>Spliceosome_Homo sapiens_hsa03040</b>                                          |          |          |          |          |
| Overlap      | 16/134                                                                            | 16/134   | 13/134   | 15/134   | 13/134   |
| Adj. p-value | 2.56E-06                                                                          | 9.06E-06 | 3.99E-04 | 1.08E-05 | 1.35E-04 |
| Comb. score  | 20.95                                                                             | 25.83    | 15.02    | 16.95    | 7.37     |
| <b>19</b>    | <b>Osteoclast differentiation_Homo sapiens_hsa04380</b>                           |          |          |          |          |
| Overlap      | 15/132                                                                            | 14/132   | 11/132   | 17/132   | 13/132   |
| Adj. p-value | 1.09E-05                                                                          | 1.05E-04 | 3.38E-03 | 3.88E-07 | 1.18E-04 |
| Comb. score  | 19.17                                                                             | 19.68    | 9.28     | 25.39    | 7.89     |
| <b>20</b>    | <b>Hepatitis C_Homo sapiens_hsa05160</b>                                          |          |          |          |          |
| Overlap      | 15/133                                                                            | 8/133    | 9/133    | 15/133   | 14/133   |
| Adj. p-value | 1.14E-05                                                                          | 5.27E-02 | 2.25E-02 | 1.06E-05 | 3.59E-05 |
| Comb. score  | 18.38                                                                             | 0.78     | 2.68     | 18.03    | 12.18    |
| <b>21</b>    | <b>B cell receptor signaling pathway_Homo sapiens_hsa04662</b>                    |          |          |          |          |
| Overlap      | 11/73                                                                             | 4/73     | 4/73     | 8/73     | 8/73     |
| Adj. p-value | 1.66E-05                                                                          | 2.14E-01 | 2.11E-01 | 1.49E-03 | 1.40E-03 |
| Comb. score  | 17.46                                                                             | -2.50    | -2.73    | 1.12     | -0.69    |
| <b>22</b>    | <b>Influenza A_Homo sapiens_hsa05164</b>                                          |          |          |          |          |
| Overlap      | 17/175                                                                            | 10/175   | 9/175    | 16/175   | 16/175   |
| Adj. p-value | 1.69E-05                                                                          | 3.91E-02 | 7.88E-02 | 4.70E-05 | 4.44E-05 |
| Comb. score  | 18.71                                                                             | 1.93     | 0.10     | 12.99    | 12.09    |
| <b>23</b>    | <b>Colorectal cancer_Homo sapiens_hsa05210</b>                                    |          |          |          |          |
| Overlap      | 10/62                                                                             | 5/62     | 6/62     | 9/62     | 10/62    |
| Adj. p-value | 2.36E-05                                                                          | 5.35E-02 | 1.84E-02 | 1.05E-04 | 1.90E-05 |
| Comb. score  | 14.51                                                                             | -2.20    | 1.47     | 5.44     | 11.49    |
| <b>24</b>    | <b>Renal cell carcinoma_Homo sapiens_hsa05211</b>                                 |          |          |          |          |
| Overlap      | 10/66                                                                             | 7/66     | 8/66     | 12/66    | 9/66     |
| Adj. p-value | 4.06E-05                                                                          | 6.48E-03 | 2.13E-03 | 7.72E-07 | 1.52E-04 |
| Comb. score  | 13.32                                                                             | 4.44     | 10.37    | 21.49    | 3.14     |
| <b>25</b>    | <b>AGE-RAGE signaling pathway in diabetic complications_Homo sapiens_hsa04933</b> |          |          |          |          |
| Overlap      | 12/101                                                                            | 7/101    | 8/101    | 11/101   | 12/101   |
| Adj. p-value | 5.93E-05                                                                          | 4.02E-02 | 1.70E-02 | 1.91E-04 | 4.35E-05 |
| Comb. score  | 15.76                                                                             | 1.49     | 4.95     | 8.62     | 12.41    |
| <b>26</b>    | <b>Legionellosis_Homo sapiens_hsa05134</b>                                        |          |          |          |          |
| Overlap      | 9/55                                                                              | 11/55    | 7/55     | 10/55    | 9/55     |
| Adj. p-value | 5.93E-05                                                                          | 5.71E-06 | 3.26E-03 | 8.55E-06 | 4.35E-05 |
| Comb. score  | 10.66                                                                             | 29.69    | 7.40     | 15.56    | 5.72     |
| <b>27</b>    | <b>Neurotrophin signaling pathway_Homo sapiens_hsa04722</b>                       |          |          |          |          |
| Overlap      | 13/120                                                                            | 10/120   | 14/120   | 17/120   | 15/120   |
| Adj. p-value | 6.74E-05                                                                          | 4.82E-03 | 3.88E-05 | 1.27E-07 | 3.38E-06 |
| Comb. score  | 13.78                                                                             | 7.30     | 22.43    | 30.22    | 21.43    |
| <b>28</b>    | <b>Wnt signaling pathway_Homo sapiens_hsa04310</b>                                |          |          |          |          |
| Overlap      | 14/142                                                                            | 9/142    | 12/142   | 14/142   | 15/142   |
| Adj. p-value | 8.33E-05                                                                          | 3.10E-02 | 2.13E-03 | 6.66E-05 | 1.90E-05 |
| Comb. score  | 13.11                                                                             | 2.25     | 11.43    | 10.83    | 15.26    |
| <b>29</b>    | <b>Signaling pathways regulating pluripotency of stem cells_hsa04550</b>          |          |          |          |          |
| Overlap      | 14/142                                                                            | 13/142   | 17/142   | 16/142   | 14/142   |
| Adj. p-value | 8.33E-05                                                                          | 6.01E-04 | 3.74E-06 | 5.33E-06 | 6.18E-05 |
| Comb. score  | 12.96                                                                             | 13.68    | 27.86    | 19.89    | 9.32     |
| <b>30</b>    | <b>Prostate cancer_Homo sapiens_hsa05215</b>                                      |          |          |          |          |
| Overlap      | 11/89                                                                             | 5/89     | 7/89     | 12/89    | 13/89    |
| Adj. p-value | 8.33E-05                                                                          | 1.59E-01 | 2.37E-02 | 1.47E-05 | 3.38E-06 |
| Comb. score  | 12.36                                                                             | -1.36    | 1.84     | 15.57    | 22.43    |
| <b>31</b>    | <b>Insulin resistance_Homo sapiens_hsa04931</b>                                   |          |          |          |          |
| Overlap      | 12/109                                                                            | 9/109    | 9/109    | 13/109   | 12/109   |
| Adj. p-value | 1.09E-04                                                                          | 7.23E-03 | 8.58E-03 | 2.06E-05 | 7.99E-05 |
| Comb. score  | 11.64                                                                             | 4.96     | 5.98     | 13.78    | 8.17     |
| <b>32</b>    | <b>Chemokine signaling pathway_Homo sapiens_hsa04062</b>                          |          |          |          |          |
| Overlap      | 16/187                                                                            | 8/187    | 11/187   | 10/187   | 9/187    |
| Adj. p-value | 1.13E-04                                                                          | 2.02E-01 | 2.47E-02 | 3.82E-02 | 8.19E-02 |
| Comb. score  | 11.88                                                                             | -0.82    | 2.32     | -1.91    | -2.45    |

Table-T6: KEGG pathways on CLL dataset

|              | 100%                                                                   |          | 50%      |          | 70%      |  |
|--------------|------------------------------------------------------------------------|----------|----------|----------|----------|--|
|              | Ground Truth                                                           | Observed | Imputed  | Observed | Imputed  |  |
| <b>33</b>    | <b>TNF signaling pathway_Homo sapiens_hsa04668</b>                     |          |          |          |          |  |
| Overlap      | 12/110                                                                 | 12/110   | 8/110    | 16/110   | 15/110   |  |
| Adj. p-value | 1.13E-04                                                               | 2.81E-04 | 2.25E-02 | 1.94E-07 | 1.27E-06 |  |
| Comb. score  | 11.69                                                                  | 17.22    | 2.60     | 28.21    | 24.78    |  |
| <b>34</b>    | <b>Cytosolic DNA-sensing pathway_Homo sapiens_hsa04623</b>             |          |          |          |          |  |
| Overlap      | 9/64                                                                   | 6/64     | 6/64     | 7/64     | 7/64     |  |
| Adj. p-value | 1.58E-04                                                               | 1.99E-02 | 2.02E-02 | 2.87E-03 | 3.04E-03 |  |
| Comb. score  | 5.45                                                                   | 0.03     | 0.22     | -5.01    | -4.50    |  |
| <b>35</b>    | <b>Endometrial cancer_Homo sapiens_hsa05213</b>                        |          |          |          |          |  |
| Overlap      | 8/52                                                                   | 5/52     | 8/52     | 6/52     | 7/52     |  |
| Adj. p-value | 2.19E-04                                                               | 3.10E-02 | 4.52E-04 | 4.41E-03 | 9.32E-04 |  |
| Comb. score  | 5.51                                                                   | -1.45    | 13.31    | -7.65    | -4.28    |  |
| <b>36</b>    | <b>TGF-beta signaling pathway_Homo sapiens_hsa04350</b>                |          |          |          |          |  |
| Overlap      | 10/84                                                                  | 11/84    | 10/84    | 11/84    | 10/84    |  |
| Adj. p-value | 2.37E-04                                                               | 1.27E-04 | 4.75E-04 | 4.27E-05 | 1.81E-04 |  |
| Comb. score  | 8.13                                                                   | 18.51    | 13.58    | 10.66    | 4.50     |  |
| <b>37</b>    | <b>p53 signaling pathway_Homo sapiens_hsa04115</b>                     |          |          |          |          |  |
| Overlap      | 9/69                                                                   | 8/69     | 6/69     | 9/69     | 8/69     |  |
| Adj. p-value | 2.67E-04                                                               | 2.23E-03 | 2.47E-02 | 2.22E-04 | 9.81E-04 |  |
| Comb. score  | 5.17                                                                   | 7.30     | -0.65    | 2.78     | -2.47    |  |
| <b>38</b>    | <b>Small cell lung cancer_Homo sapiens_hsa05222</b>                    |          |          |          |          |  |
| Overlap      | 10/86                                                                  | 4/86     | 4/86     | 8/86     | 12/86    |  |
| Adj. p-value | 2.76E-04                                                               | 2.94E-01 | 3.01E-01 | 3.51E-03 | 1.24E-05 |  |
| Comb. score  | 7.16                                                                   | -2.41    | -2.36    | -2.15    | 16.50    |  |
| <b>39</b>    | <b>MicroRNAs in cancer_Homo sapiens_hsa05206</b>                       |          |          |          |          |  |
| Overlap      | 20/297                                                                 | 13/297   | 17/297   | 20/297   | 20/297   |  |
| Adj. p-value | 3.03E-04                                                               | 8.87E-02 | 7.41E-03 | 2.54E-04 | 2.31E-04 |  |
| Comb. score  | 9.57                                                                   | 0.32     | 7.32     | 7.94     | 6.54     |  |
| <b>40</b>    | <b>Cell cycle_Homo sapiens_hsa04110</b>                                |          |          |          |          |  |
| Overlap      | 12/124                                                                 | 11/124   | 9/124    | 12/124   | 16/124   |  |
| Adj. p-value | 3.07E-04                                                               | 2.08E-03 | 1.72E-02 | 2.56E-04 | 1.12E-06 |  |
| Comb. score  | 7.19                                                                   | 9.20     | 3.71     | 5.49     | 22.90    |  |
| <b>41</b>    | <b>Toll-like receptor signaling pathway_Homo sapiens_hsa04620</b>      |          |          |          |          |  |
| Overlap      | 11/106                                                                 | 9/106    | 6/106    | 13/106   | 14/106   |  |
| Adj. p-value | 3.17E-04                                                               | 6.52E-03 | 1.41E-01 | 1.57E-05 | 3.99E-06 |  |
| Comb. score  | 7.80                                                                   | 5.91     | -0.90    | 15.10    | 20.81    |  |
| <b>42</b>    | <b>Leishmaniasis_Homo sapiens_hsa05140</b>                             |          |          |          |          |  |
| Overlap      | 9/73                                                                   | 7/73     | 6/73     | 8/73     | 9/73     |  |
| Adj. p-value | 3.69E-04                                                               | 9.35E-03 | 3.05E-02 | 1.49E-03 | 2.92E-04 |  |
| Comb. score  | 4.85                                                                   | 2.53     | -0.37    | 0.14     | 1.11     |  |
| <b>43</b>    | <b>Pertussis_Homo sapiens_hsa05133</b>                                 |          |          |          |          |  |
| Overlap      | 9/75                                                                   | 9/75     | 6/75     | 11/75    | 10/75    |  |
| Adj. p-value | 4.46E-04                                                               | 9.43E-04 | 3.35E-02 | 1.57E-05 | 7.58E-05 |  |
| Comb. score  | 3.54                                                                   | 10.33    | -1.02    | 10.79    | 4.59     |  |
| <b>44</b>    | <b>NF-kappa B signaling pathway_Homo sapiens_hsa04064</b>              |          |          |          |          |  |
| Overlap      | 10/93                                                                  | 13/93    | 9/93     | 11/93    | 12/93    |  |
| Adj. p-value | 4.65E-04                                                               | 1.48E-05 | 3.53E-03 | 9.93E-05 | 2.19E-05 |  |
| Comb. score  | 4.97                                                                   | 23.47    | 7.54     | 7.73     | 11.86    |  |
| <b>45</b>    | <b>Tuberculosis_Homo sapiens_hsa05152</b>                              |          |          |          |          |  |
| Overlap      | 14/178                                                                 | 14/178   | 12/178   | 16/178   | 15/178   |  |
| Adj. p-value | 6.64E-04                                                               | 1.34E-03 | 8.98E-03 | 5.51E-05 | 1.73E-04 |  |
| Comb. score  | 6.40                                                                   | 11.29    | 5.87     | 11.16    | 6.87     |  |
| <b>46</b>    | <b>Toxoplasmosis_Homo sapiens_hsa05145</b>                             |          |          |          |          |  |
| Overlap      | 11/118                                                                 | 9/118    | 8/118    | 14/118   | 14/118   |  |
| Adj. p-value | 7.44E-04                                                               | 1.14E-02 | 3.03E-02 | 1.15E-05 | 1.24E-05 |  |
| Comb. score  | 5.83                                                                   | 3.97     | 1.47     | 17.30    | 17.67    |  |
| <b>47</b>    | <b>HIF-1 signaling pathway_Homo sapiens_hsa04066</b>                   |          |          |          |          |  |
| Overlap      | 10/103                                                                 | 9/103    | 8/103    | 13/103   | 11/103   |  |
| Adj. p-value | 1.02E-03                                                               | 6.00E-03 | 1.82E-02 | 1.24E-05 | 1.99E-04 |  |
| Comb. score  | 5.01                                                                   | 6.50     | 3.74     | 15.51    | 4.90     |  |
| <b>48</b>    | <b>Chagas disease (American trypanosomiasis)_Homo sapiens_hsa05142</b> |          |          |          |          |  |
| Overlap      | 10/104                                                                 | 11/104   | 8/104    | 16/104   | 13/104   |  |
| Adj. p-value | 1.08E-03                                                               | 6.01E-04 | 1.85E-02 | 1.27E-07 | 1.48E-05 |  |
| Comb. score  | 4.54                                                                   | 13.62    | 3.28     | 30.48    | 15.87    |  |

|              | 100%                                                                                    |          | 50%      |          | 70%      |  |
|--------------|-----------------------------------------------------------------------------------------|----------|----------|----------|----------|--|
|              | Ground Truth                                                                            | Observed | Imputed  | Observed | Imputed  |  |
| <b>49</b>    | <b>Epithelial cell signaling in Helicobacter pylori infection_Homo sapiens_hsa05120</b> |          |          |          |          |  |
| Overlap      | 8/68                                                                                    | 7/68     | 5/68     | 8/68     | 9/68     |  |
| Adj. p-value | 1.09E-03                                                                                | 6.79E-03 | 7.11E-02 | 9.75E-04 | 1.82E-04 |  |
| Comb. score  | 1.45                                                                                    | 3.08     | -2.43    | -0.06    | 1.77     |  |
| <b>50</b>    | <b>Salmonella infection_Homo sapiens_hsa05132</b>                                       |          |          |          |          |  |
| Overlap      | 9/86                                                                                    | 8/86     | 7/86     | 9/86     | 11/86    |  |
| Adj. p-value | 1.10E-03                                                                                | 6.52E-03 | 2.14E-02 | 9.91E-04 | 4.67E-05 |  |
| Comb. score  | 2.16                                                                                    | 3.90     | 1.37     | 0.95     | 6.85     |  |
| <b>51</b>    | <b>Melanoma_Homo sapiens_hsa05218</b>                                                   |          |          |          |          |  |
| Overlap      | 8/71                                                                                    | 6/71     | 8/71     | 9/71     | 9/71     |  |
| Adj. p-value | 1.41E-03                                                                                | 3.02E-02 | 3.12E-03 | 2.56E-04 | 2.38E-04 |  |
| Comb. score  | 2.02                                                                                    | 1.06     | 9.51     | 3.45     | 1.81     |  |
| <b>52</b>    | <b>PI3K-Akt signaling pathway_Homo sapiens_hsa04151</b>                                 |          |          |          |          |  |
| Overlap      | 20/341                                                                                  | 20/341   | 17/341   | 24/341   | 22/341   |  |
| Adj. p-value | 1.43E-03                                                                                | 2.71E-03 | 2.14E-02 | 3.31E-05 | 1.99E-04 |  |
| Comb. score  | 5.83                                                                                    | 10.90    | 4.25     | 15.24    | 7.85     |  |
| <b>53</b>    | <b>Adherens junction_Homo sapiens_hsa04520</b>                                          |          |          |          |          |  |
| Overlap      | 8/74                                                                                    | 6/74     | 6/74     | 4/74     | 3/74     |  |
| Adj. p-value | 1.73E-03                                                                                | 3.36E-02 | 3.19E-02 | 1.81E-01 | 4.20E-01 |  |
| Comb. score  | 0.42                                                                                    | -0.06    | -0.67    | -4.33    | -2.99    |  |
| <b>54</b>    | <b>Longevity regulating pathway - mammal_Homo sapiens_hsa04211</b>                      |          |          |          |          |  |
| Overlap      | 9/94                                                                                    | 7/94     | 8/94     | 11/94    | 9/94     |  |
| Adj. p-value | 1.88E-03                                                                                | 3.10E-02 | 1.20E-02 | 1.05E-04 | 1.70E-03 |  |
| Comb. score  | 2.20                                                                                    | 1.79     | 5.09     | 8.44     | 0.68     |  |
| <b>55</b>    | <b>Natural killer cell mediated cytotoxicity_Homo sapiens_hsa04650</b>                  |          |          |          |          |  |
| Overlap      | 11/135                                                                                  | 3/135    | 5/135    | 6/135    | 7/135    |  |
| Adj. p-value | 1.89E-03                                                                                | 8.45E-01 | 3.93E-01 | 1.92E-01 | 9.30E-02 |  |
| Comb. score  | 2.96                                                                                    | -0.72    | -1.57    | -2.36    | -2.56    |  |
| <b>56</b>    | <b>Ras signaling pathway_Homo sapiens_hsa04014</b>                                      |          |          |          |          |  |
| Overlap      | 15/227                                                                                  | 12/227   | 15/227   | 16/227   | 14/227   |  |
| Adj. p-value | 1.96E-03                                                                                | 3.82E-02 | 3.99E-03 | 7.12E-04 | 4.73E-03 |  |
| Comb. score  | 3.75                                                                                    | 2.36     | 9.48     | 5.87     | 1.42     |  |
| <b>57</b>    | <b>Jak-STAT signaling pathway_Homo sapiens_hsa04630</b>                                 |          |          |          |          |  |
| Overlap      | 12/158                                                                                  | 7/158    | 7/158    | 10/158   | 11/158   |  |
| Adj. p-value | 1.97E-03                                                                                | 2.03E-01 | 2.02E-01 | 1.49E-02 | 5.35E-03 |  |
| Comb. score  | 3.17                                                                                    | -0.82    | -0.99    | -0.39    | 0.30     |  |
| <b>58</b>    | <b>Thyroid hormone signaling pathway_Homo sapiens_hsa04919</b>                          |          |          |          |          |  |
| Overlap      | 10/118                                                                                  | 10/118   | 7/118    | 10/118   | 10/118   |  |
| Adj. p-value | 2.29E-03                                                                                | 4.36E-03 | 7.34E-02 | 2.19E-03 | 2.22E-03 |  |
| Comb. score  | 1.61                                                                                    | 7.39     | -0.25    | 1.23     | 1.04     |  |
| <b>59</b>    | <b>Apoptosis_Homo sapiens_hsa04210</b>                                                  |          |          |          |          |  |
| Overlap      | 11/140                                                                                  | 13/140   | 10/140   | 18/140   | 15/140   |  |
| Adj. p-value | 2.36E-03                                                                                | 5.83E-04 | 1.32E-02 | 1.94E-07 | 1.71E-05 |  |
| Comb. score  | 2.62                                                                                    | 15.57    | 5.80     | 29.92    | 17.09    |  |
| <b>60</b>    | <b>Non-alcoholic fatty liver disease (NAFLD)_Homo sapiens_hsa04932</b>                  |          |          |          |          |  |
| Overlap      | 11/151                                                                                  | 11/151   | 7/151    | 16/151   | 13/151   |  |
| Adj. p-value | 4.18E-03                                                                                | 6.78E-03 | 1.76E-01 | 1.06E-05 | 3.81E-04 |  |
| Comb. score  | 1.85                                                                                    | 6.23     | -0.83    | 19.29    | 5.17     |  |
| <b>61</b>    | <b>Hippo signaling pathway_Homo sapiens_hsa04390</b>                                    |          |          |          |          |  |
| Overlap      | 11/153                                                                                  | 13/153   | 14/153   | 12/153   | 13/153   |  |
| Adj. p-value | 4.57E-03                                                                                | 1.10E-03 | 3.99E-04 | 1.49E-03 | 4.28E-04 |  |
| Comb. score  | 0.95                                                                                    | 11.26    | 14.77    | 2.61     | 3.71     |  |
| <b>62</b>    | <b>Focal adhesion_Homo sapiens_hsa04510</b>                                             |          |          |          |          |  |
| Overlap      | 13/202                                                                                  | 6/202    | 9/202    | 12/202   | 9/202    |  |
| Adj. p-value | 4.86E-03                                                                                | 5.75E-01 | 1.49E-01 | 1.17E-02 | 1.15E-01 |  |
| Comb. score  | 1.50                                                                                    | -1.12    | -0.51    | -0.21    | -2.34    |  |
| <b>63</b>    | <b>FoxO signaling pathway_Homo sapiens_hsa04068</b>                                     |          |          |          |          |  |
| Overlap      | 10/133                                                                                  | 8/133    | 9/133    | 11/133   | 14/133   |  |
| Adj. p-value | 5.12E-03                                                                                | 5.27E-02 | 2.25E-02 | 1.56E-03 | 3.59E-05 |  |
| Comb. score  | 0.61                                                                                    | 0.90     | 2.82     | 2.28     | 12.44    |  |
| <b>64</b>    | <b>Tight junction_Homo sapiens_hsa04530</b>                                             |          |          |          |          |  |
| Overlap      | 10/139                                                                                  | 6/139    | 5/139    | 8/139    | 9/139    |  |
| Adj. p-value | 6.88E-03                                                                                | 2.54E-01 | 4.09E-01 | 4.54E-02 | 1.81E-02 |  |
| Comb. score  | 0.18                                                                                    | -1.22    | -1.56    | -2.11    | -1.68    |  |
| <b>65</b>    | <b>Phospholipase D signaling pathway_Homo sapiens_hsa04072</b>                          |          |          |          |          |  |
| Overlap      | 10/144                                                                                  | 4/144    | 7/144    | 7/144    | 8/144    |  |
| Adj. p-value | 8.76E-03                                                                                | 6.70E-01 | 1.50E-01 | 1.16E-01 | 5.33E-02 |  |
| Comb. score  | 0.50                                                                                    | -1.06    | -0.78    | -2.41    | -2.32    |  |

Table-T7: KEGG pathways on CLL dataset (continued from Table-T6)

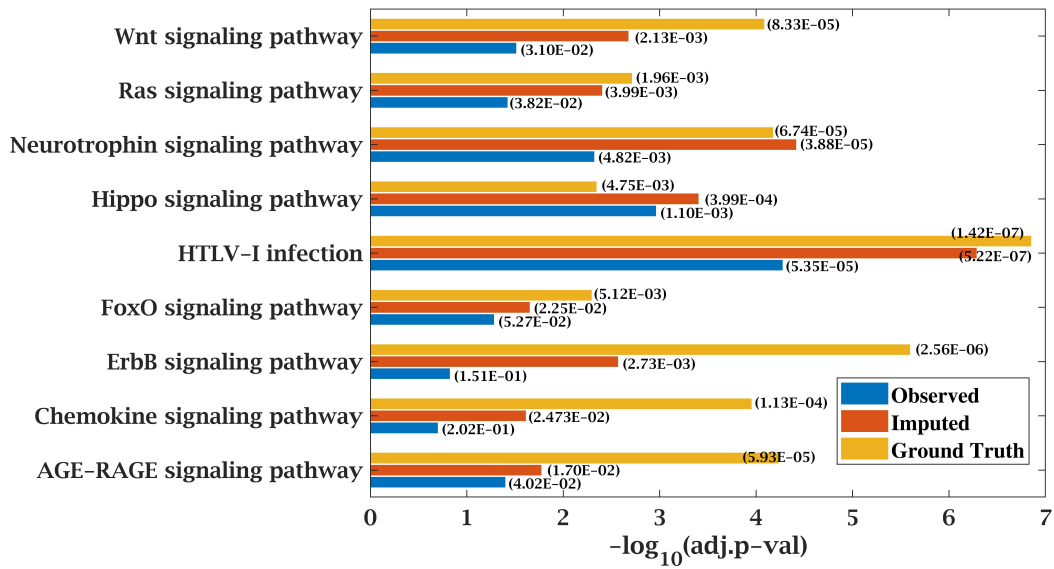

**Figure S1.** Few important KEGG pathways at 50% observed and imputed data for CLL data. Adjusted  $p$ -values are shown in brackets.

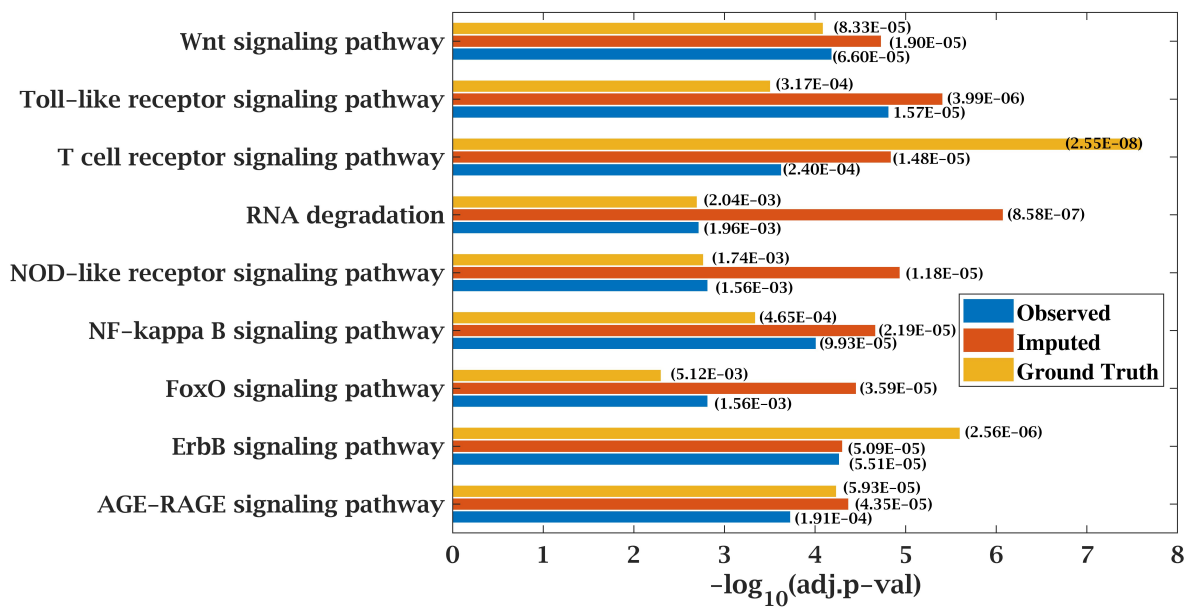

**Figure S2.** Few important KEGG pathways at 70% observed and imputed data for CLL data. Adjusted  $p$ -values are shown in brackets.



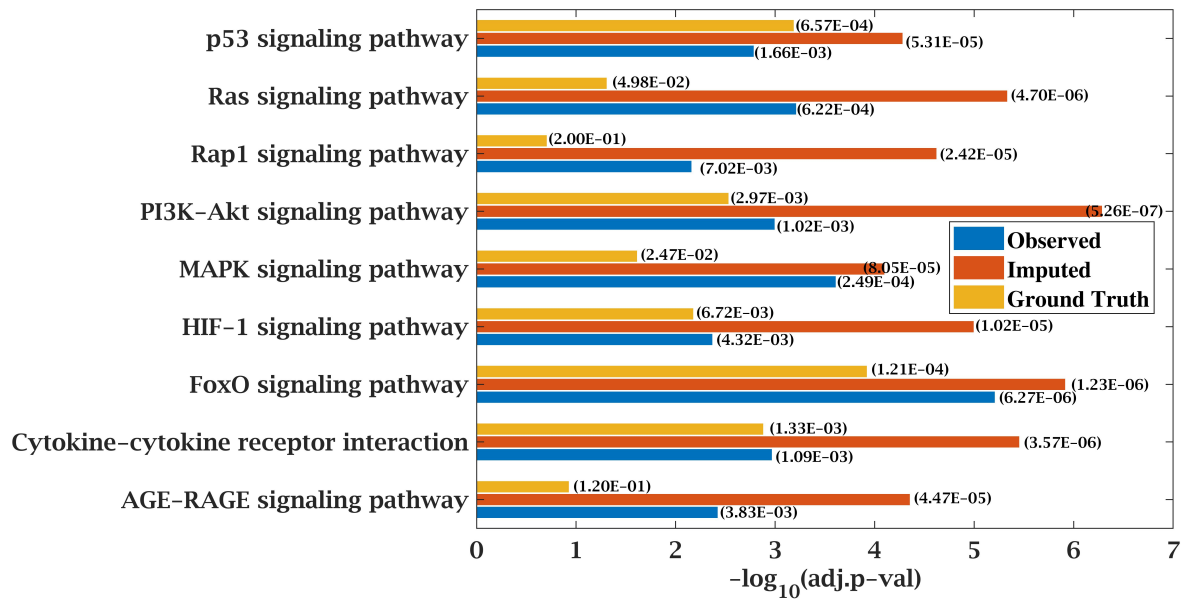

**Figure S3.** Few important KEGG pathways at 70% observed and imputed data for AML data. Adjusted p-values are shown in brackets.

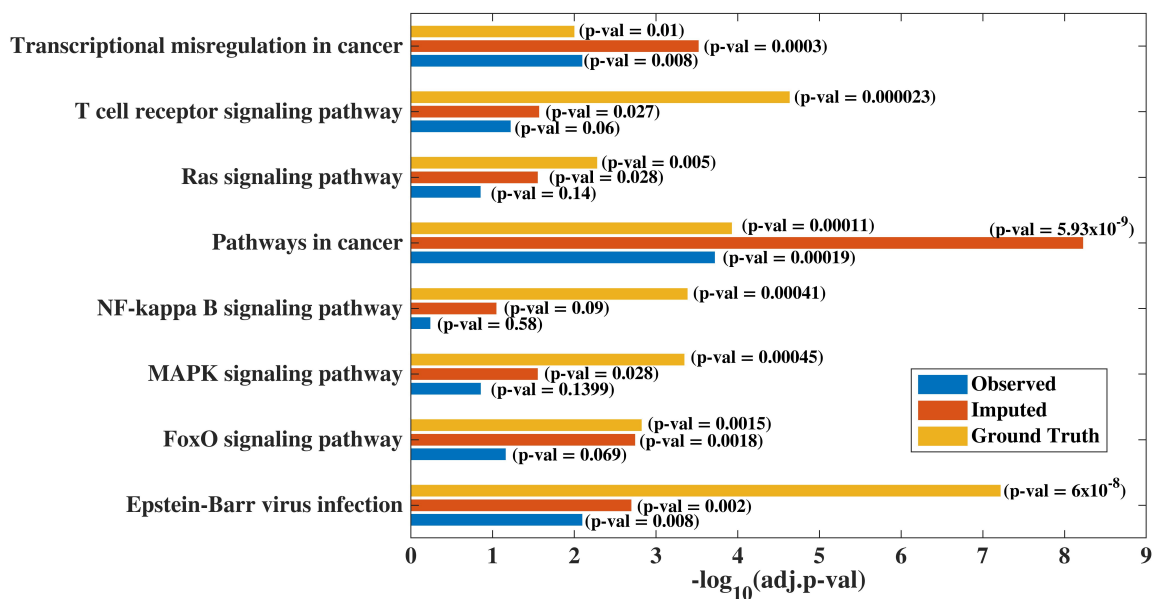

**Figure S4.** Few important KEGG pathways at 50% observed and imputed data for MM-Spanish data. Adjusted p-values are shown in brackets.

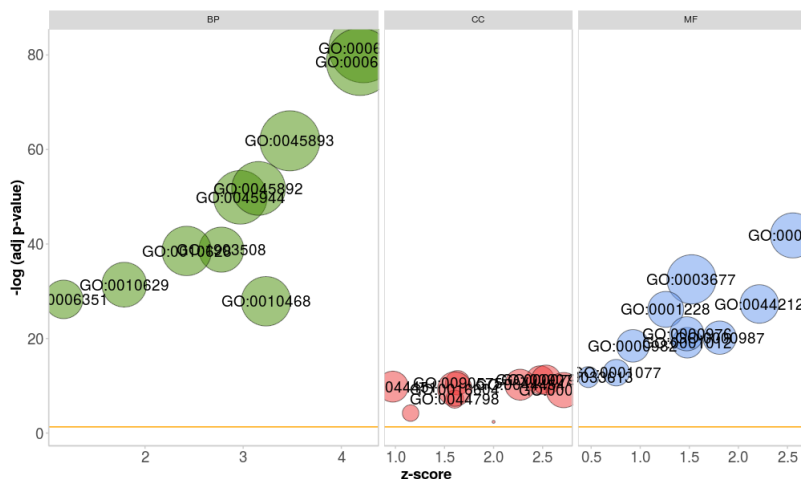

(a) Original

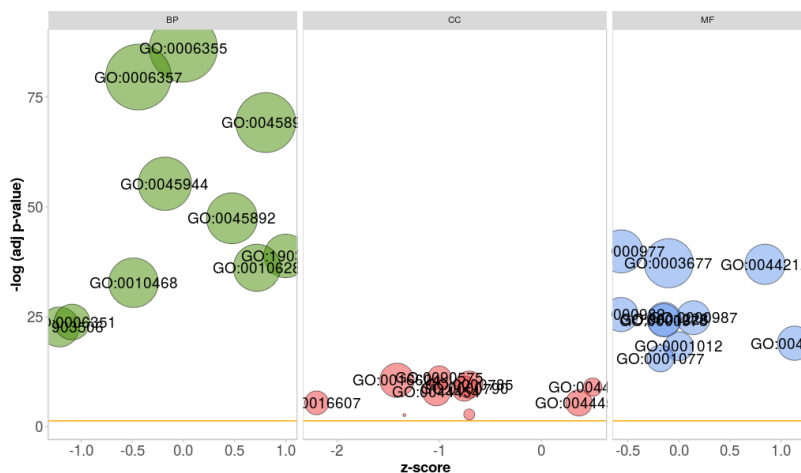

(b) 50% observed input

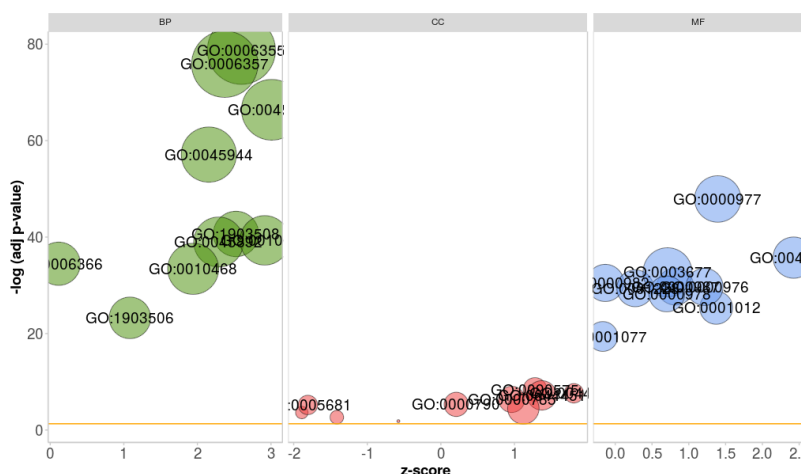

(c) Imputed data

**Figure S5.** GO bubble plots on CLL dataset. Only top 50 significant pathways are used to draw this bubble plot. Green Bubbles (BP-Biological process), Red bubbles (CC-Cellular Component) and Blue bubbles (MF- Molecular Function)

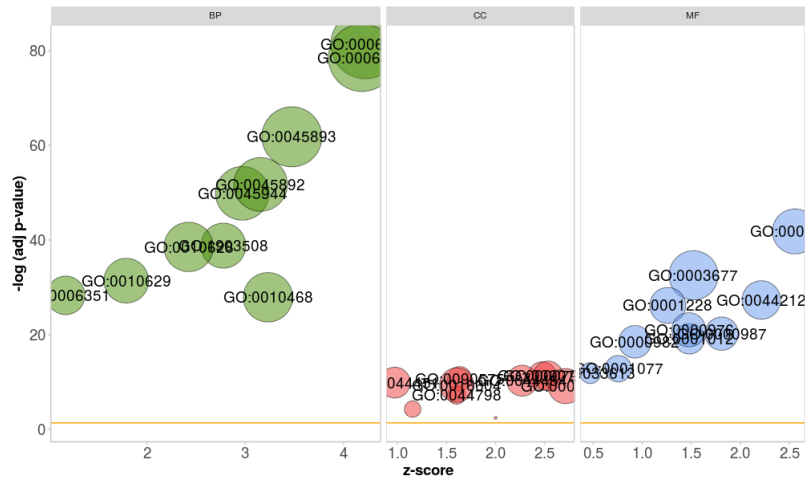

(a) Original

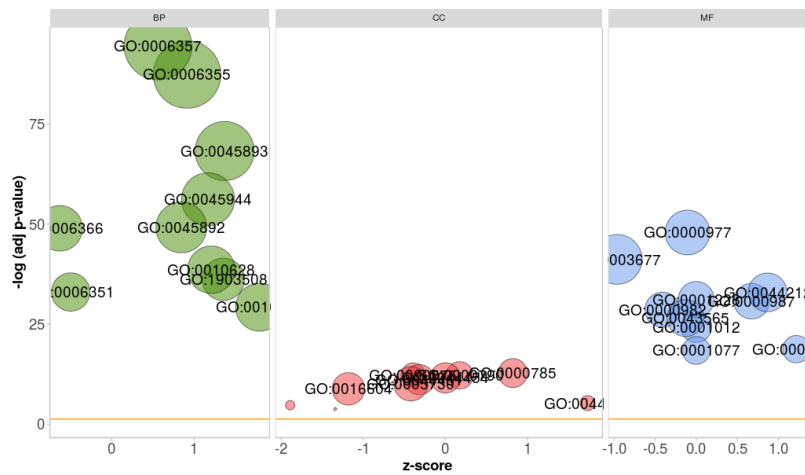

(b) 70% observed input

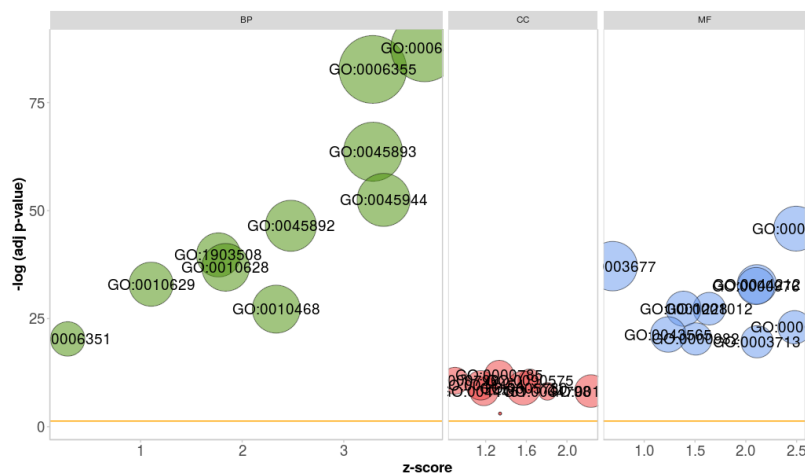

(c) Imputed data

**Figure S6.** GO bubble plots on CLL dataset. Only top 50 significant pathways are used to draw this bubble plot. Green Bubbles (BP-Biological process), Red bubbles (CC-Cellular Component) and Blue bubbles (MF- Molecular Function)

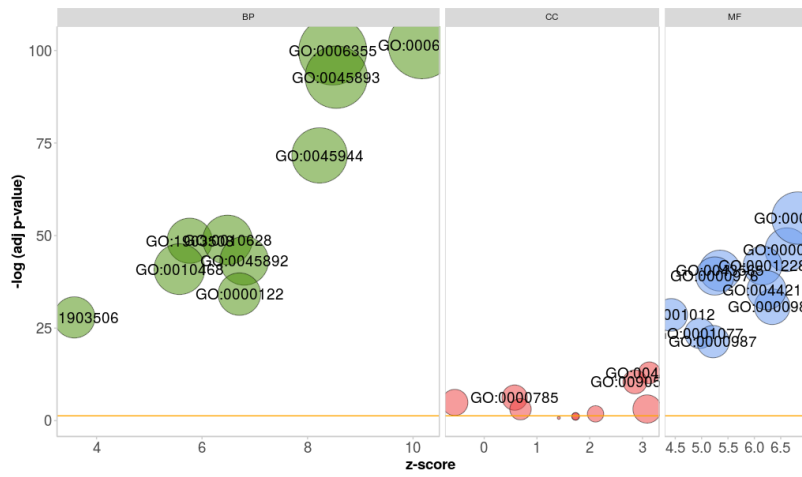

(a) Original

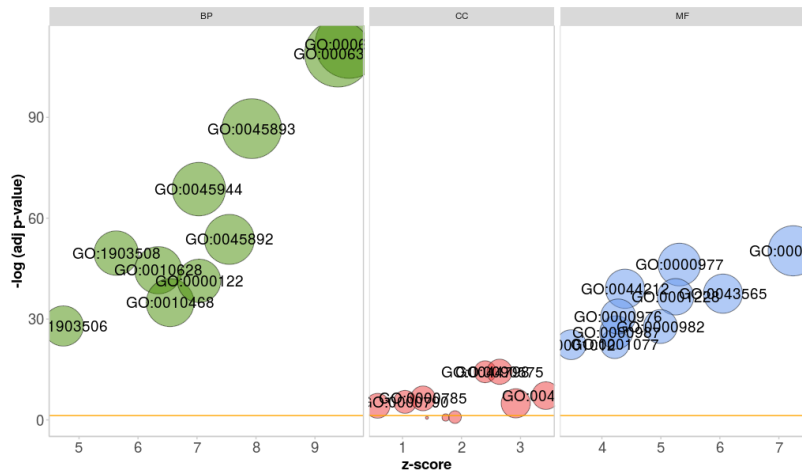

(b) 50% observed input

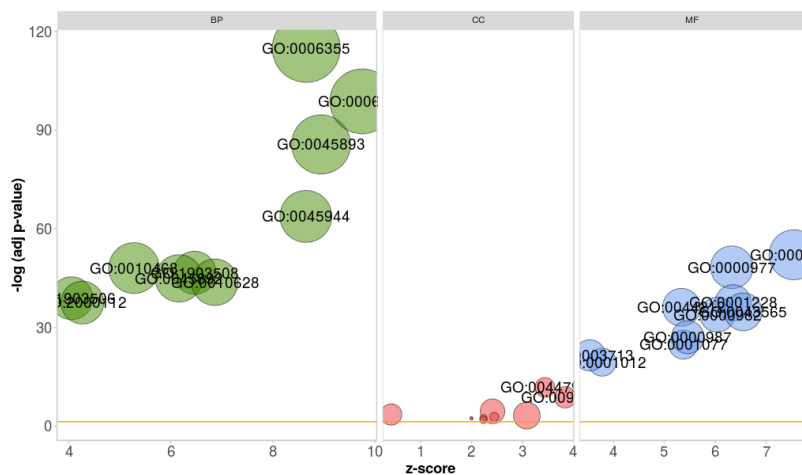

(c) Imputed data

**Figure S7.** GO bubble plots on AML dataset. Only top 50 significant pathways are used to draw this bubble plot. Green Bubbles (BP-Biological process), Red bubbles (CC-Cellular Component) and Blue bubbles (MF- Molecular Function)

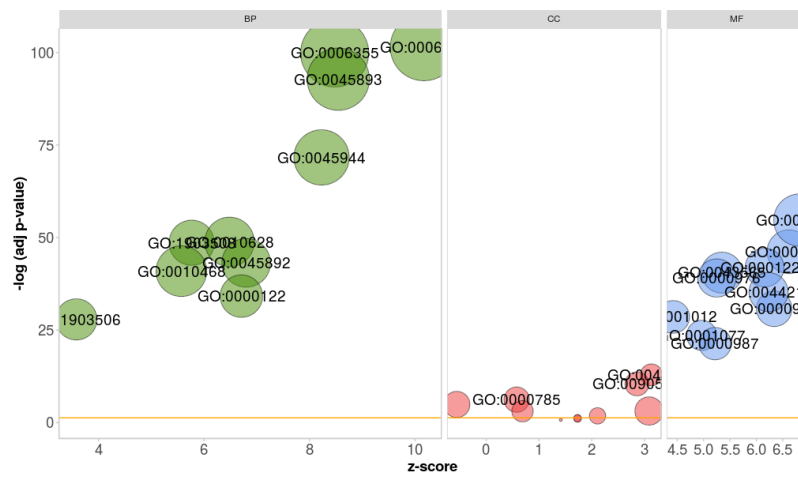

(a) Original

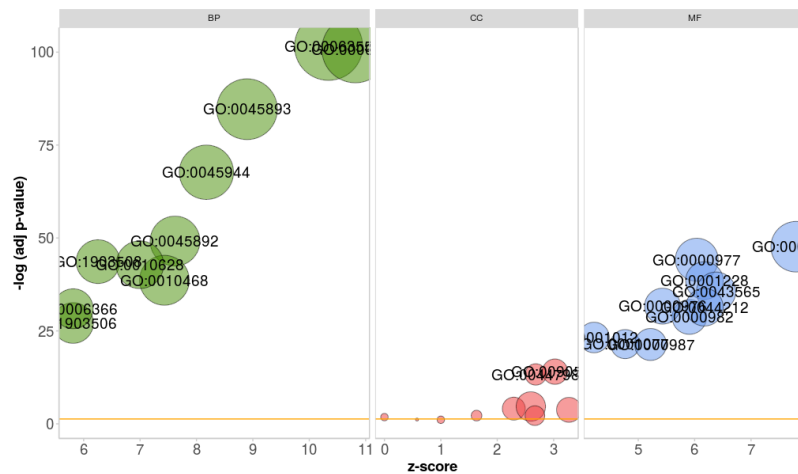

(b) 70% observed input

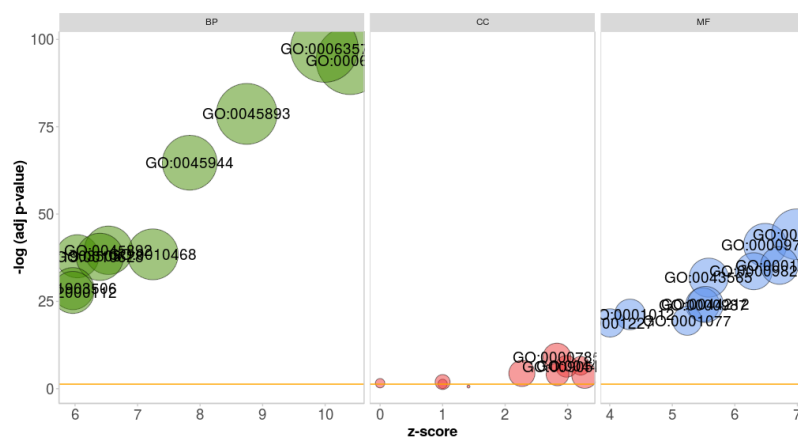

(c) Imputed data

**Figure S8.** GO bubble plots on AML dataset. Only top 50 significant pathways are used to draw this bubble plot. Green Bubbles (BP-Biological process), Red bubbles (CC-Cellular Component) and Blue bubbles (MF- Molecular Function)

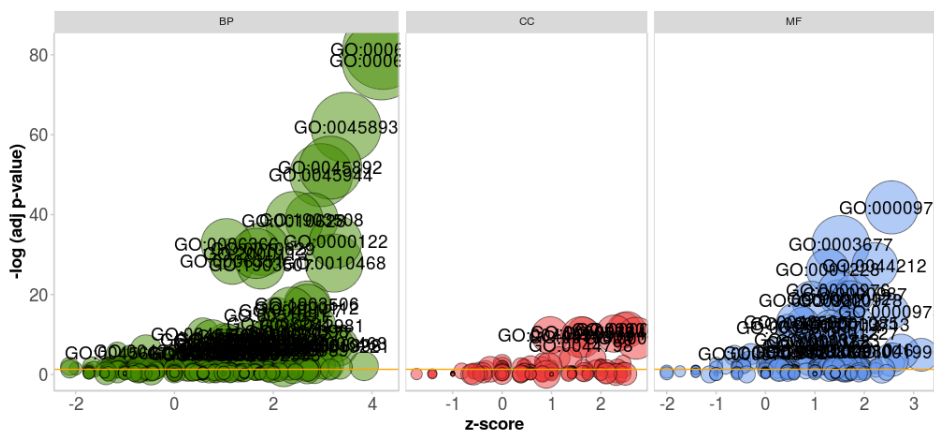

(a) Original

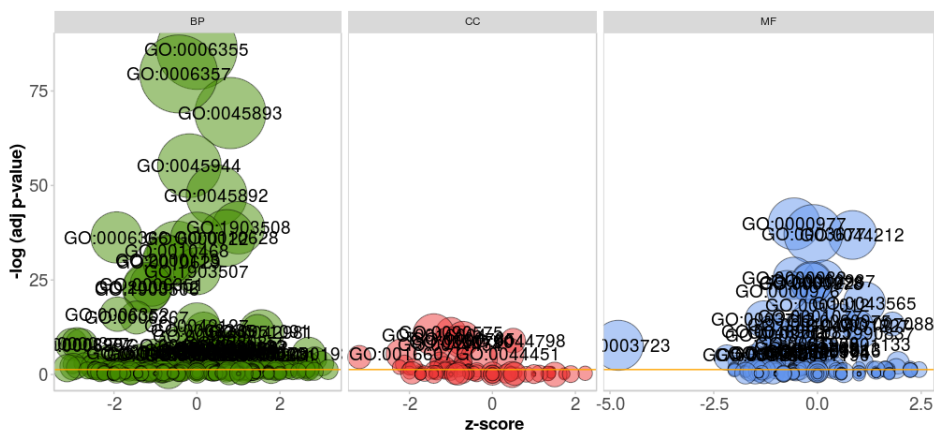

(b) 50% observed input

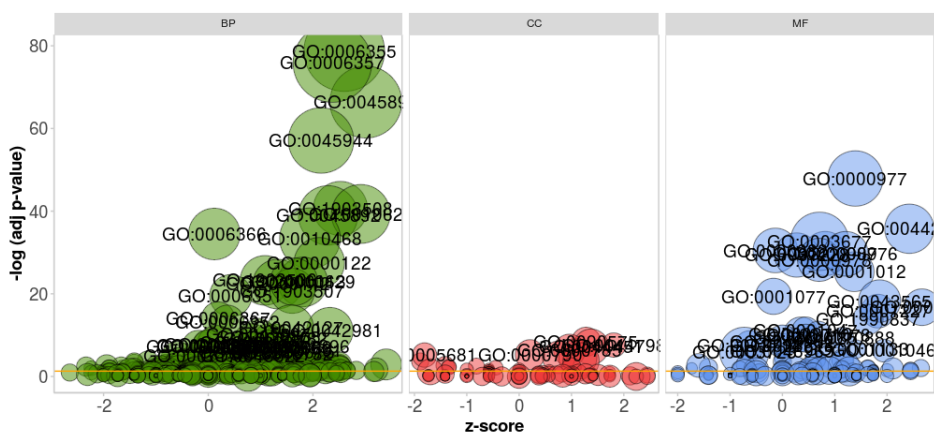

(c) Imputed data

**Figure S9.** GO bubble plots on CLL dataset. All significant pathways are used to draw this bubble plot. Green Bubbles (BP-Biological process), Red bubbles (CC-Cellular Component) and Blue bubbles (MF-Molecular Function)

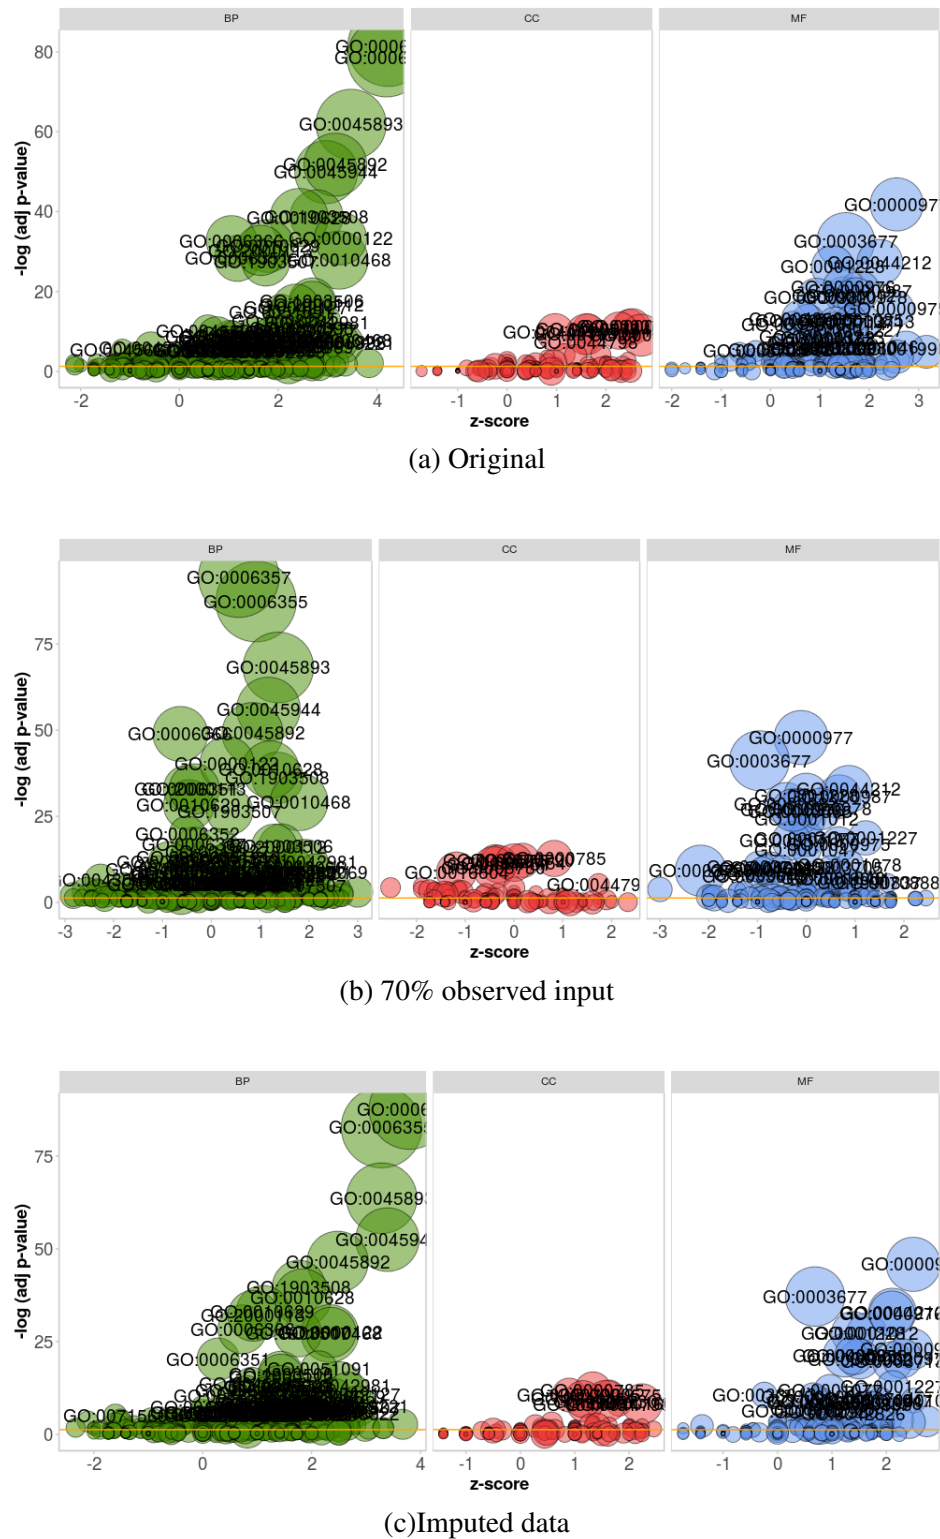

**Figure S10.** GO bubble plots on CLL dataset. All significant pathways are used to draw this bubble plot. Green Bubbles (BP-Biological process), Red bubbles (CC-Cellular Component) and Blue bubbles (MF-Molecular Function)

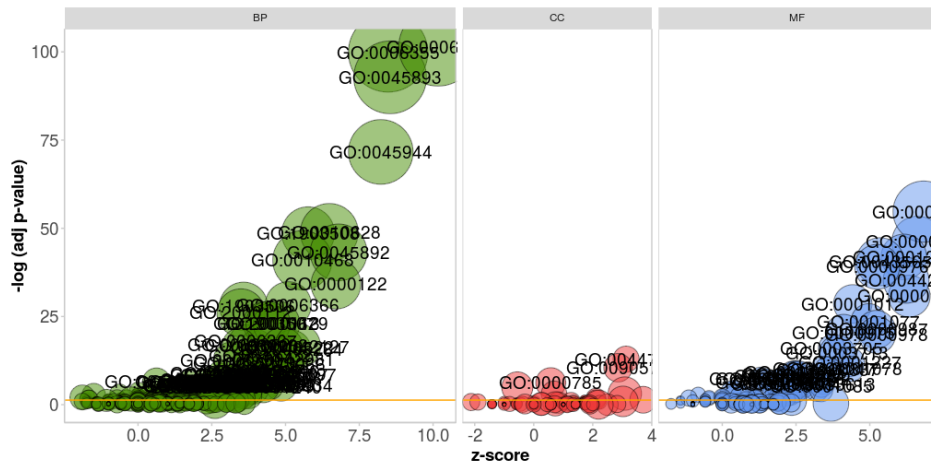

(a) Original

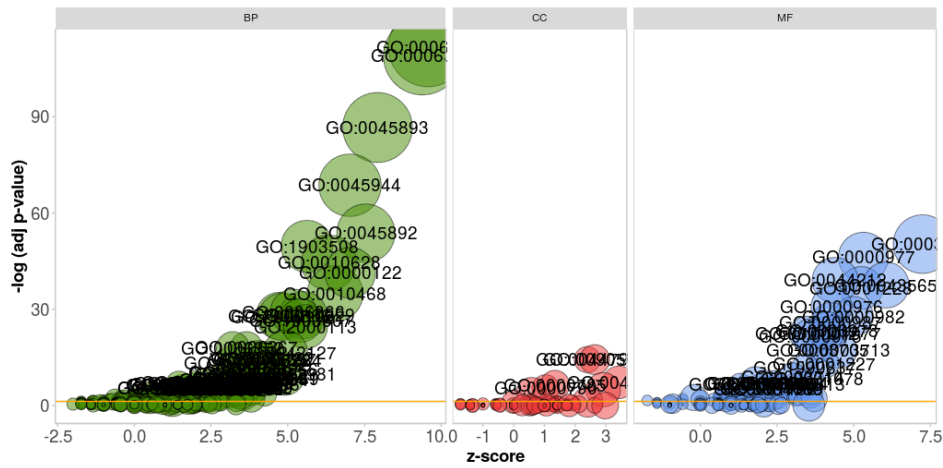

(b) 50% observed input

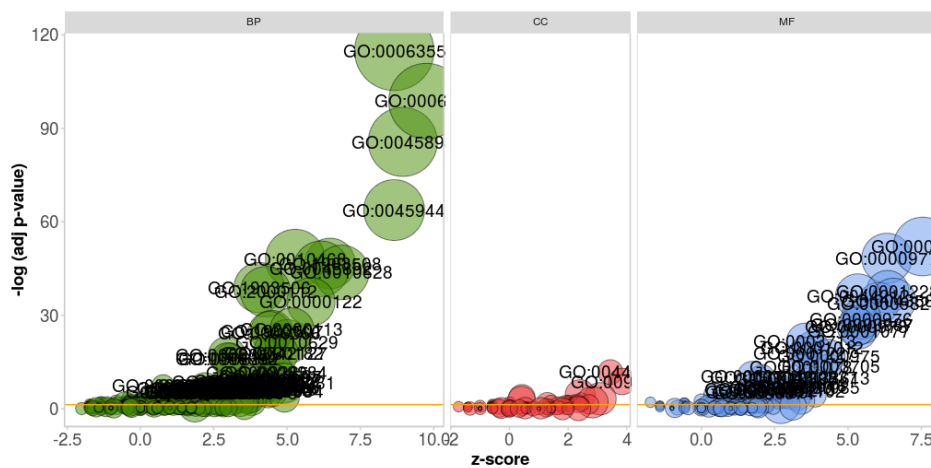

(c) Imputed data

**Figure S11.** GO bubble plots on AML dataset. All significant pathways are used to draw this bubble plot. Green Bubbles (BP-Biological process), Red bubbles (CC-Cellular Component) and Blue bubbles (MF-Molecular Function)



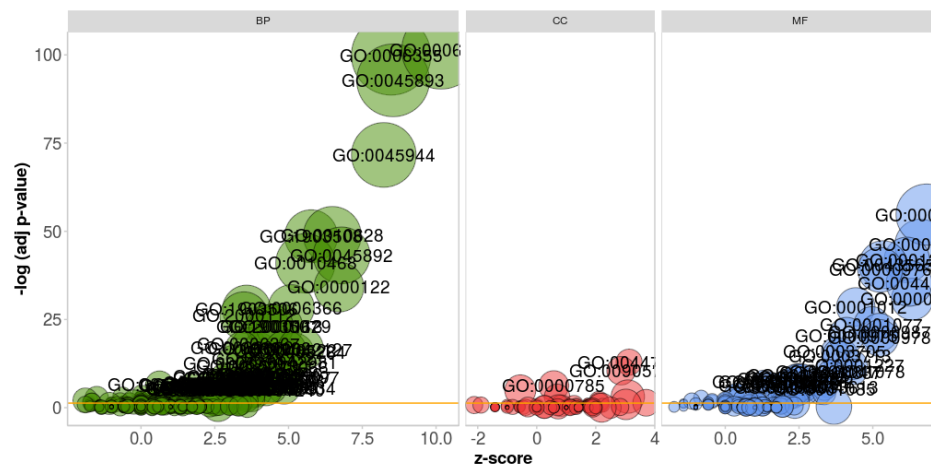

(a) Original

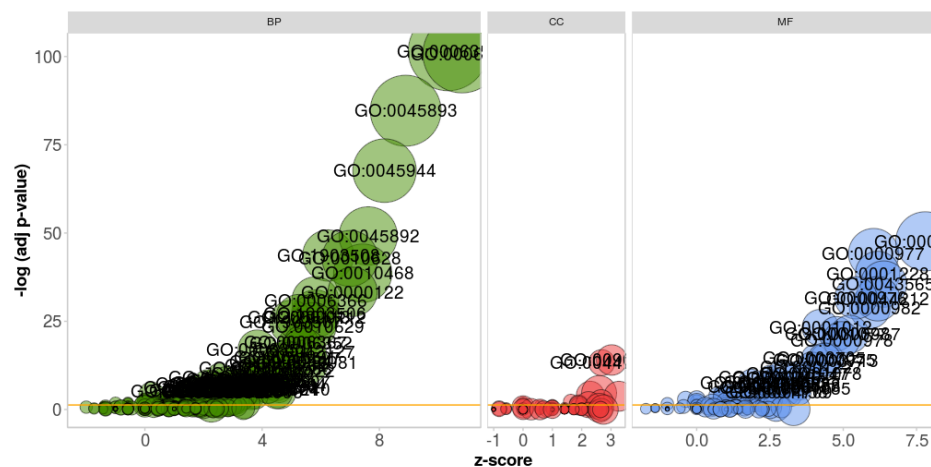

(b) 70% observed input

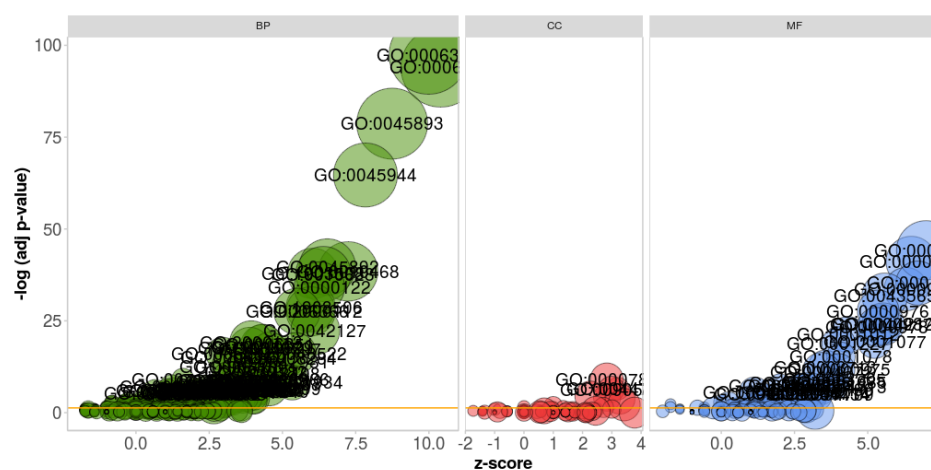

(c) Imputed data

**Figure S12.** GO bubble plots on AML dataset. All significant pathways are used to draw this bubble plot. Green Bubbles (BP-Biological process), Red bubbles (CC-Cellular Component) and Blue bubbles (MF-Molecular Function)
